# Supplementary material for: Impact of Biological Feedback and Incentives on Blood Fatty Acid Concentrations, Including Omega-3 Index, in an Employer-Based Wellness Program
Source: Nutrients. 2017 Aug 5;9(8):842. doi: 10.3390/nu9080842 (PMC5579635; doi:10.3390/nu9080842)
Supplement: Supplementary file 1 [file nutrients-09-00842-s001.zip]

Archive with 6 entries (6 files):
- Figure S5 Coupon incentive.pdf
- Figure S6 Test report.pdf
- Figure S1 Advertisement.pdf
- Figure S2 Consent form.pdf
- Figure S3 Test request form.pdf
- Figure S4 Filter paper for blood spot.jpg
