# Supplementary material for: Impact of Biological Feedback and Incentives on Blood Fatty Acid Concentrations, Including Omega-3 Index, in an Employer-Based Wellness Program
Source: Nutrients. 2017 Aug 5;9(8):842. doi: 10.3390/nu9080842 (PMC5579635; doi:10.3390/nu9080842)
Supplement: Supplementary file 1 [file nutrients-09-00842-s001.zip › Figure S1 Advertisement.pdf]

# THE **OMEGA-3 PARADOX**

**DEFICIENT IN THE DIET ...  
YET ESSENTIAL FOR ALL LIFE STAGES**

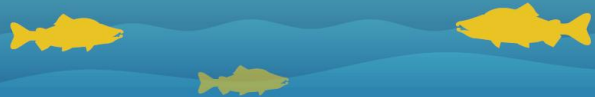

**We are not getting enough  
Omega-3s for health**

Omega-3 Global Zone of Consensus:  
Minimum 250 mg/ day EPA + DHA  
or at least 2 servings/week oily fish.<sup>1</sup>

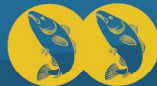

Roughly 8 in 10 Americans have  
an inadequate omega-3 status.<sup>2</sup>

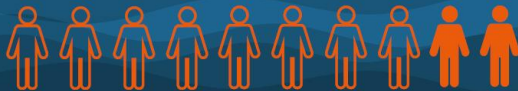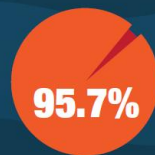

of Americans are below  
“Cardio Protection” omega-3  
concentrations.<sup>2</sup>

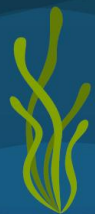

**Omega-3s are important  
for health throughout  
all stages of life**

New!

Have your omega-3 status  
measured as part of our onsite  
wellness screening!

If you have questions, contact Michael McBurney, PhD

Telephone: 973-257-8232

Cellular: 862-222-3646

E-mail: [Michael.McBurney@dsm.com](mailto:Michael.McBurney@dsm.com)

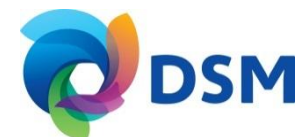

<sup>1</sup> Mozaffarian D and Wu J. 2011 J Am Coll Card 58:2047

<sup>2</sup> Murphy R et al. 2015. Nutrients 7:10282
