# Supplementary material for: Impact of Biological Feedback and Incentives on Blood Fatty Acid Concentrations, Including Omega-3 Index, in an Employer-Based Wellness Program
Source: Nutrients. 2017 Aug 5;9(8):842. doi: 10.3390/nu9080842 (PMC5579635; doi:10.3390/nu9080842)
Supplement: Supplementary file 1 [file nutrients-09-00842-s001.zip › Figure S3 Test request form.pdf]

## Omega-3 Index Test Request Form

1. Name \_\_\_\_\_

\*\*\* Must match the name on the sample collection booklet \*\*

2. Results Email \_\_\_\_\_

3. Date of birth \_\_\_\_\_  
Month Day YearCollection date \_\_\_\_\_  
Month Day Year

4. Male \_\_\_\_\_

Female \_\_\_\_\_

Estimate your consumption over the past 2 months of the following foods.  
A serving is about the size of a pack of playing cards.

Servings

5. How many 3 oz. servings of the following fish do you eat monthly? \_\_\_\_\_

|               |          |           |
|---------------|----------|-----------|
| bluefish      | herring  | sardines  |
| blue fin tuna | mackerel | salmon    |
| cisco, smoked | pollock  | whitefish |

6. How many 3 oz. servings of the following fish do you eat monthly? \_\_\_\_\_

|          |          |                        |
|----------|----------|------------------------|
| bass     | mussels  | squid                  |
| calamari | perch    | swordfish              |
| catfish  | redfish  | trout                  |
| drumfish | rockfish | tuna, canned (6oz can) |
| flounder | shark    | whiting                |
| grouper  | snapper  |                        |
| halibut  | sole     |                        |

7. How many 3 oz. servings of the following fish/shellfish do you eat monthly? \_\_\_\_\_

|                      |             |                  |
|----------------------|-------------|------------------|
| carp                 | fish sticks | pompano          |
| clams                | haddock     | scallops         |
| cod                  | lobster     | shrimp (14 med.) |
| crab                 | mullet      | sturgeon         |
| crayfish             | oysters     |                  |
| fish patties/squares | pike        |                  |

8. How many 3 oz. servings of liver (chicken, turkey or beef) do you eat monthly? \_\_\_\_\_

9. How many egg yolks do you eat weekly (including egg yolks used in cooking)? \_\_\_\_\_

10. How many 3 oz. servings of chicken, turkey or other poultry (not including livers) do you eat weekly? \_\_\_\_\_

11. Any omega-3 dietary supplements or functional foods (i.e. flax, fish oil, Neuromins, DHA Gold, high DHA eggs)?

amount or strength \_\_\_\_\_ frequency \_\_\_\_\_  
milligrams per day
