# Supplementary material for: Impact of Biological Feedback and Incentives on Blood Fatty Acid Concentrations, Including Omega-3 Index, in an Employer-Based Wellness Program
Source: Nutrients. 2017 Aug 5;9(8):842. doi: 10.3390/nu9080842 (PMC5579635; doi:10.3390/nu9080842)
Supplement: Supplementary file 1 [file nutrients-09-00842-s001.zip › Figure S6 Test report.pdf]

## OMEGA-3 INDEX REPORT

NAME: Surname, First  
DOB: mm/dd/yyyy  
ID:

COLLECTION DATE: mm/dd/yyyy  
RESULT DATE: mm/dd/yyyy  
PROVIDER:  
ACCOUNT: DSM Screening

Your Index

4.22%

Reference Range\*: 2.90% - 12.90%

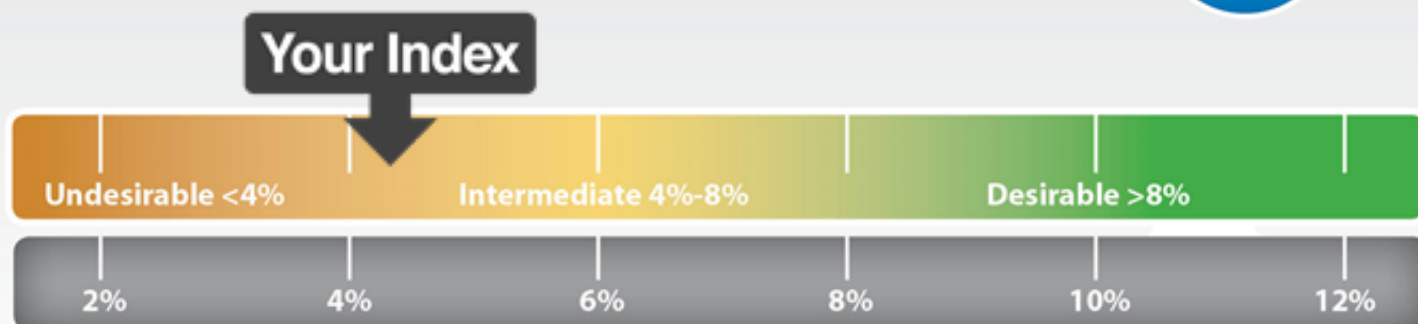

\* Reference Ranges encompass about 99% of US adults. Visit our FAQ section for more information on Ratios and Ranges.

Your Omega-3 Index is in the intermediate range of 4 - 8%. You are advised to increase your intake of omega-3 fatty acids.

Many studies have shown that people with higher (vs. lower) omega-3 index levels are at decreased risk for a variety of diseases. These include heart disease, stroke, dementia, and depression to name a few. These people even live longer than those with lower levels. Raising your omega-3 index and keeping it up should help reduce your risk these conditions.

Omega-3 fatty acids are found primarily in fish, especially "oily" fish such as those near the top in the accompanying table. The two most important omega-3 fatty acids are EPA and DHA.

The amount of EPA+DHA you would need to take in order to raise your Omega-3 Index into the target range (>8%) cannot be predicted with certainty. Many factors – age, sex, weight, dietary and genetic factors, smoking, medications you may be taking, other medical conditions, etc. – all can influence your body's response to additional EPA+DHA. Nevertheless, we would recommend that you increase your current EPA+DHA intake by 0.5–1 grams (500 – 1000 mg) per day. Although this can be accomplished by eating more oily fish, fish oil supplements are usually necessary to achieve this level of EPA+DHA intake. The table lists the approximate amount of EPA and DHA per 3-oz. serving of a variety of sea foods and in dietary supplements.

It should be noted that omega-3 fatty acids from flaxseed oil (alpha-linolenic acid, or ALA) will have little to no effect on your Omega-3 Index. Therefore, ALA is not an effective substitute for EPA and DHA.

The only way to know how your body will respond to an increased intake of EPA+DHA is to measure your Omega-3 Index again. You should wait for 3-4 months before re-testing in order to give your system time to adjust to your increased intake. Once you have achieved your target Omega-3 Index you should re-check your values every six months.

| Fish and Seafood                                                              | EPA     | DHA     | EPA+DHA |
|-------------------------------------------------------------------------------|---------|---------|---------|
| Atlantic Salmon (farmed)                                                      | 587     | 1238    | 1825    |
| Pacific Herring                                                               | 1056    | 751     | 1807    |
| Atlantic Herring                                                              | 773     | 939     | 1712    |
| Atlantic Salmon (wild)                                                        | 349     | 1215    | 1564    |
| Bluefin Tuna                                                                  | 309     | 970     | 1279    |
| Coho Salmon (wild)                                                            | 462     | 706     | 1168    |
| Pink Salmon (wild)                                                            | 456     | 638     | 1094    |
| Coho Salmon (farmed)                                                          | 347     | 740     | 1087    |
| Mackerel (canned)                                                             | 369     | 677     | 1046    |
| Sockeye Salmon (wild)                                                         | 353     | 690     | 1043    |
| Chum Salmon (canned)                                                          | 402     | 597     | 999     |
| Sardines (canned)                                                             | 402     | 433     | 835     |
| Pink Salmon (canned)                                                          | 233     | 579     | 812     |
| Swordfish                                                                     | 108     | 656     | 764     |
| Rainbow Trout (farmed)                                                        | 220     | 524     | 744     |
| Albacore (or White) Tuna (canned)                                             | 198     | 535     | 733     |
| Shark (raw)                                                                   | 269     | 448     | 717     |
| Sea Bass                                                                      | 175     | 473     | 648     |
| Atlantic Pollock                                                              | 77      | 383     | 460     |
| King Crab                                                                     | 251     | 100     | 351     |
| Walleye/Pike                                                                  | 94      | 245     | 339     |
| Dungeness Crab                                                                | 239     | 96      | 335     |
| Oysters (farmed, raw)                                                         | 160     | 173     | 333     |
| Skipjack Tuna                                                                 | 77      | 201     | 278     |
| Flat Fish (Flounder/Sole)                                                     | 143     | 112     | 255     |
| Clams                                                                         | 117     | 124     | 241     |
| Mixed Shrimp                                                                  | 115     | 120     | 235     |
| Light Chunk Tuna                                                              | 40      | 190     | 230     |
| Catfish (wild)                                                                | 85      | 116     | 201     |
| Halibut                                                                       | 68      | 132     | 200     |
| King Mackerel                                                                 | 5       | 193     | 198     |
| Scallops                                                                      | 61      | 88      | 149     |
| Blue Crab                                                                     | 86      | 57      | 143     |
| Cod                                                                           | 3       | 131     | 134     |
| Mahi-Mahi (Dolphin Fish)                                                      | 22      | 96      | 118     |
| Tilapia                                                                       | 4       | 110     | 114     |
| Yellowfin Tuna                                                                | 13      | 89      | 102     |
| Catfish (farmed)                                                              | 17      | 59      | 76      |
| <i>Dietary Supplements – Amount (mg) per 1,000 mg capsule or per teaspoon</i> |         |         |         |
| Standard Drug Store Fish Oil Capsules                                         | 180     | 120     | 300     |
| Fish Oil Concentrates (many varieties)                                        | 100-400 | 100-400 | 300-700 |
| Cod Liver Oil (teaspoon)                                                      | 300     | 500     | 800     |
